# Supplementary material for: Increased plasma XOR activity induced by NAFLD/NASH and its possible involvement in vascular neointimal proliferation
Source: JCI journal article supplement (doi:10.1172/jci.insight.144762), 2021-09-07
Supplement: sd1 [file 1]

**Supplemental Table 1. Baseline clinical characteristics of morbidly obese patients who underwent bariatric surgery.**

| <b>Clinical parameters</b>             |                           |
|----------------------------------------|---------------------------|
| <b>n (males/females)</b>               | <b>12 (8/4)</b>           |
| <b>Age (years)</b>                     | <b>46.9 ± 5.9</b>         |
| <b>BW (kg)</b>                         | <b>111.5 ± 14.1</b>       |
| <b>BMI (kg/m<sup>2</sup>)</b>          | <b>38.3 ± 4.5</b>         |
| <b>FPG (mg/dL)</b>                     | <b>96.6 ± 14.3</b>        |
| <b>HbA1c (%)</b>                       | <b>6.0 ± 1.0</b>          |
| <b>T-cho (mg/dL)</b>                   | <b>196.3 ± 33.7</b>       |
| <b>LDL-cho (mg/dL)</b>                 | <b>130.7 ± 38.2</b>       |
| <b>HDL-cho (mg/dL)</b>                 | <b>48.1 ± 12.1</b>        |
| <b>TG (mg/dL)</b>                      | <b>132.5 (91.5-156.3)</b> |
| <b>AST (IU/L)</b>                      | <b>23.0 (18.3-27.8)</b>   |
| <b>ALT (IU/L)</b>                      | <b>33.5 (17.5-38.8)</b>   |
| <b>γ-GTP (IU/L)</b>                    | <b>40.5 (22.5-53.0)</b>   |
| <b>Creatinine (mg/dL)</b>              | <b>0.83 ± 0.21</b>        |
| <b>eGFR (ml/min/1.73m<sup>2</sup>)</b> | <b>74.1 ± 13.2</b>        |
| <b>UA (mg/dL)</b>                      | <b>6.9 ± 1.8</b>          |
| <b>hs-CRP (mg/dL)</b>                  | <b>0.18 (0.12-0.34)</b>   |
| <b>Adiponectin (μg/mL)</b>             | <b>6.3 (4.3-9.4)</b>      |
| <b>XOR activity (pmol/h/mL)</b>        | <b>129.0 (56.7-375.5)</b> |
| <b>Complication of type 2 diabetes</b> | <b>50 (%)</b>             |
| <b>Complication of hypertension</b>    | <b>50 (%)</b>             |
| <b>Complication of dyslipidemia</b>    | <b>67 (%)</b>             |

Data are presented as means ± SD, medians (IQRs), or the number of subjects (%). BW, body weight; BMI, body mass index; FPG, fasting plasma glucose; T-cho, total-cholesterol; LDL-cho, low-density lipoprotein-cholesterol; HDL-cho, high-density lipoprotein-cholesterol; TG, triglyceride; AST, aspartate transaminase; ALT, alanine transaminase; γ-GTP, γ-glutamyl transpeptidase; eGFR, estimated glomerular filtration rate; UA, uric acid; hs-CRP, high sensitivity C reactive protein; XOR, xanthine oxidoreductase.

**Supplemental Table 2. Correlations between baseline plasma XOR activity and other clinical parameters.**

| <b>Clinical parameters</b>             | <b>R</b>     | <b><i>p</i> value</b> |
|----------------------------------------|--------------|-----------------------|
| <b>Sex</b>                             | <b>0.31</b>  | <b>0.322</b>          |
| <b>Age</b>                             | <b>-0.12</b> | <b>0.709</b>          |
| <b>BW</b>                              | <b>-0.51</b> | <b>0.087</b>          |
| <b>BMI</b>                             | <b>-0.22</b> | <b>0.485</b>          |
| <b>FPG</b>                             | <b>0.16</b>  | <b>0.619</b>          |
| <b>HbA1c</b>                           | <b>0.18</b>  | <b>0.573</b>          |
| <b>T-cho</b>                           | <b>0.20</b>  | <b>0.531</b>          |
| <b>LDL-cho</b>                         | <b>0.11</b>  | <b>0.725</b>          |
| <b>HDL-cho</b>                         | <b>0.09</b>  | <b>0.779</b>          |
| <b>Log-TG</b>                          | <b>-0.14</b> | <b>0.671</b>          |
| <b>Log-AST</b>                         | <b>0.92</b>  | <b>&lt;0.0001</b>     |
| <b>Log-ALT</b>                         | <b>0.95</b>  | <b>&lt;0.0001</b>     |
| <b>Log-<math>\gamma</math>-GTP</b>     | <b>0.26</b>  | <b>0.414</b>          |
| <b>Creatinine</b>                      | <b>0.002</b> | <b>0.995</b>          |
| <b>eGFR</b>                            | <b>-0.15</b> | <b>0.639</b>          |
| <b>UA</b>                              | <b>0.18</b>  | <b>0.574</b>          |
| <b>Log-hs-CRP</b>                      | <b>-0.56</b> | <b>0.060</b>          |
| <b>Log-Adiponectin</b>                 | <b>-0.29</b> | <b>0.353</b>          |
| <b>Complication of type 2 diabetes</b> | <b>0.15</b>  | <b>0.638</b>          |
| <b>Complication of hypertension</b>    | <b>0.20</b>  | <b>0.537</b>          |
| <b>Complication of dyslipidemia</b>    | <b>0.29</b>  | <b>0.366</b>          |

BW, body weight; BMI, body mass index; FPG, fasting plasma glucose; T-cho, total-cholesterol; LDL-cho, low-density lipoprotein-cholesterol; HDL-cho, high-density lipoprotein-cholesterol; TG, triglyceride; AST, aspartate transaminase; ALT, alanine transaminase;  $\gamma$ -GTP,  $\gamma$ -glutamyl transpeptidase; eGFR, estimated glomerular filtration rate; UA, uric acid; hs-CRP, high sensitivity C reactive protein; XOR, xanthine oxidoreductase.

**Supplemental Table 3. Changes in clinical parameters from baseline to 1 week or 1 year following bariatric surgery.**

| Clinical parameters               | Pre          | 1 week       | <i>p</i> value<br>(vs Pre) | 1 year       | <i>p</i> value<br>(vs Pre) |
|-----------------------------------|--------------|--------------|----------------------------|--------------|----------------------------|
| BW (kg)                           | 111.5 ± 14.1 | 107.1 ± 12.6 | 0.0003                     | 89.4 ± 14.6  | <0.0001                    |
| BMI (kg/m <sup>2</sup> )          | 38.3 ± 4.5   | 36.9 ± 4.4   | <0.0001                    | 30.7 ± 4.7   | <0.0001                    |
| FPG (mg/dL)                       | 96.6 ± 14.3  | 78.9 ± 17.4  | 0.003                      | 95.0 ± 13.9  | 0.670                      |
| HbA1c (%)                         | 6.0 ± 1.0    | -            | -                          | 5.7 ± 0.9    | 0.046                      |
| T-cho (mg/dL)                     | 196.3 ± 33.7 | 186.8 ± 34.2 | 0.306                      | 198.7 ± 34.8 | 0.842                      |
| LDL-cho (mg/dL)                   | 130.7 ± 38.2 | 128.7 ± 32.2 | 0.827                      | 118.5 ± 28.8 | 0.244                      |
| HDL-cho (mg/dL)                   | 48.1 ± 12.1  | 35.9 ± 6.9   | 0.001                      | 66.8 ± 16.1  | <0.0001                    |
| Log-TG (mg/dL)                    | 4.74 ± 0.38  | 4.67 ± 0.24  | 0.505                      | 4.52 ± 0.47  | 0.091                      |
| Log-AST (IU/L)                    | 3.20 ± 0.42  | 3.64 ± 0.55  | 0.031                      | 2.84 ± 0.17  | 0.017                      |
| Log-ALT (IU/L)                    | 3.44 ± 0.68  | 3.84 ± 0.79  | 0.131                      | 2.66 ± 0.43  | 0.005                      |
| Log-γ-GTP (IU/L)                  | 3.57 ± 0.52  | 3.79 ± 0.72  | 0.145                      | 2.97 ± 0.44  | 0.0003                     |
| Creatinine (mg/dL)                | 0.84 ± 0.21  | 0.84 ± 0.20  | 0.963                      | 0.78 ± 1.44  | 0.077                      |
| eGFR (ml/min/1.73m <sup>2</sup> ) | 74.1 ± 13.2  | 73.4 ± 11.7  | 0.826                      | 77.5 ± 8.6   | 0.217                      |
| UA (mg/dL)                        | 6.9 ± 1.8    | 8.0 ± 2.6    | 0.177                      | 6.4 ± 1.6    | 0.393                      |
| Log-hs-CRP (mg/dL)                | -1.61 ± 0.91 | 0.44 ± 0.62  | <0.0001                    | -2.51 ± 1.22 | 0.031                      |
| Log-Adiponectin (μg/mL)           | 1.82 ± 0.51  | 1.76 ± 0.54  | 0.372                      | 2.20 ± 0.56  | 0.021                      |
| Log-XOR (pmol/h/mL)               | 4.9 ± 1.3    | 5.3 ± 1.0    | 0.258                      | 3.1 ± 0.9    | 0.0001                     |

Data are presented as means ± SD. BW, body weight; BMI, body mass index; FPG, fasting plasma glucose; T-cho, total-cholesterol; LDL-cho, low-density lipoprotein-cholesterol; HDL-cho, high-density lipoprotein-cholesterol; TG, triglyceride; AST, aspartate transaminase; ALT, alanine transaminase; γ-GTP, γ-glutamyl transpeptidase; eGFR, estimated glomerular filtration rate; UA, uric acid; hs-CRP, high sensitivity C reactive protein; XOR, xanthine oxidoreductase.

**Supplemental Table 4. Correlations between changes in plasma XOR activity and those in other clinical parameters at 1 week and 1 year following bariatric surgery.**

| Clinical parameters         | 1 week       |                   | 1 year       |                |
|-----------------------------|--------------|-------------------|--------------|----------------|
|                             | R            | <i>p</i> value    | R            | <i>p</i> value |
| $\Delta$ BW                 | <b>-0.52</b> | <b>0.084</b>      | <b>0.27</b>  | <b>0.390</b>   |
| $\Delta$ BMI                | <b>-0.53</b> | <b>0.079</b>      | <b>0.27</b>  | <b>0.405</b>   |
| $\Delta$ FPG                | <b>-0.35</b> | <b>0.268</b>      | <b>0.61</b>  | <b>0.034</b>   |
| $\Delta$ HbA1c              | -            | -                 | <b>0.54</b>  | <b>0.068</b>   |
| $\Delta$ T-cho              | <b>-0.45</b> | <b>0.017</b>      | <b>0.22</b>  | <b>0.484</b>   |
| $\Delta$ LDL-cho            | <b>-0.16</b> | <b>0.614</b>      | <b>0.34</b>  | <b>0.287</b>   |
| $\Delta$ HDL-cho            | <b>0.10</b>  | <b>0.754</b>      | <b>-0.25</b> | <b>0.434</b>   |
| $\Delta$ Log-TG             | <b>-0.36</b> | <b>0.252</b>      | <b>0.33</b>  | <b>0.293</b>   |
| $\Delta$ Log-AST            | <b>0.94</b>  | <b>&lt;0.0001</b> | <b>0.76</b>  | <b>0.004</b>   |
| $\Delta$ Log-ALT            | <b>0.91</b>  | <b>&lt;0.0001</b> | <b>0.80</b>  | <b>0.002</b>   |
| $\Delta$ Log- $\gamma$ -GTP | <b>0.49</b>  | <b>0.108</b>      | <b>0.48</b>  | <b>0.117</b>   |
| $\Delta$ Creatinine         | <b>0.19</b>  | <b>0.549</b>      | <b>0.27</b>  | <b>0.398</b>   |
| $\Delta$ eGFR               | <b>-0.24</b> | <b>0.455</b>      | <b>-0.25</b> | <b>0.440</b>   |
| $\Delta$ UA                 | <b>0.15</b>  | <b>0.643</b>      | <b>0.22</b>  | <b>0.498</b>   |
| $\Delta$ Log-hs-CRP         | <b>-0.30</b> | <b>0.336</b>      | <b>-0.22</b> | <b>0.499</b>   |
| $\Delta$ Log-Adiponectin    | <b>0.25</b>  | <b>0.435</b>      | <b>-0.41</b> | <b>0.182</b>   |

BW, body weight; BMI, body mass index; FPG, fasting plasma glucose; T-cho, total-cholesterol; LDL-cho, low-density lipoprotein-cholesterol; HDL-cho, high-density lipoprotein-cholesterol; TG, triglyceride; AST, aspartate transaminase; ALT, alanine transaminase;  $\gamma$ -GTP,  $\gamma$ -glutamyl transpeptidase; eGFR, estimated glomerular filtration rate; UA, uric acid; hs-CRP, high sensitivity C reactive protein; XOR, xanthine oxidoreductase.

## Supplementary Figure Legends

## Supplemental Figure 1. Increased liver XOR in NAFLD/NASH mice fed CDAHFD.

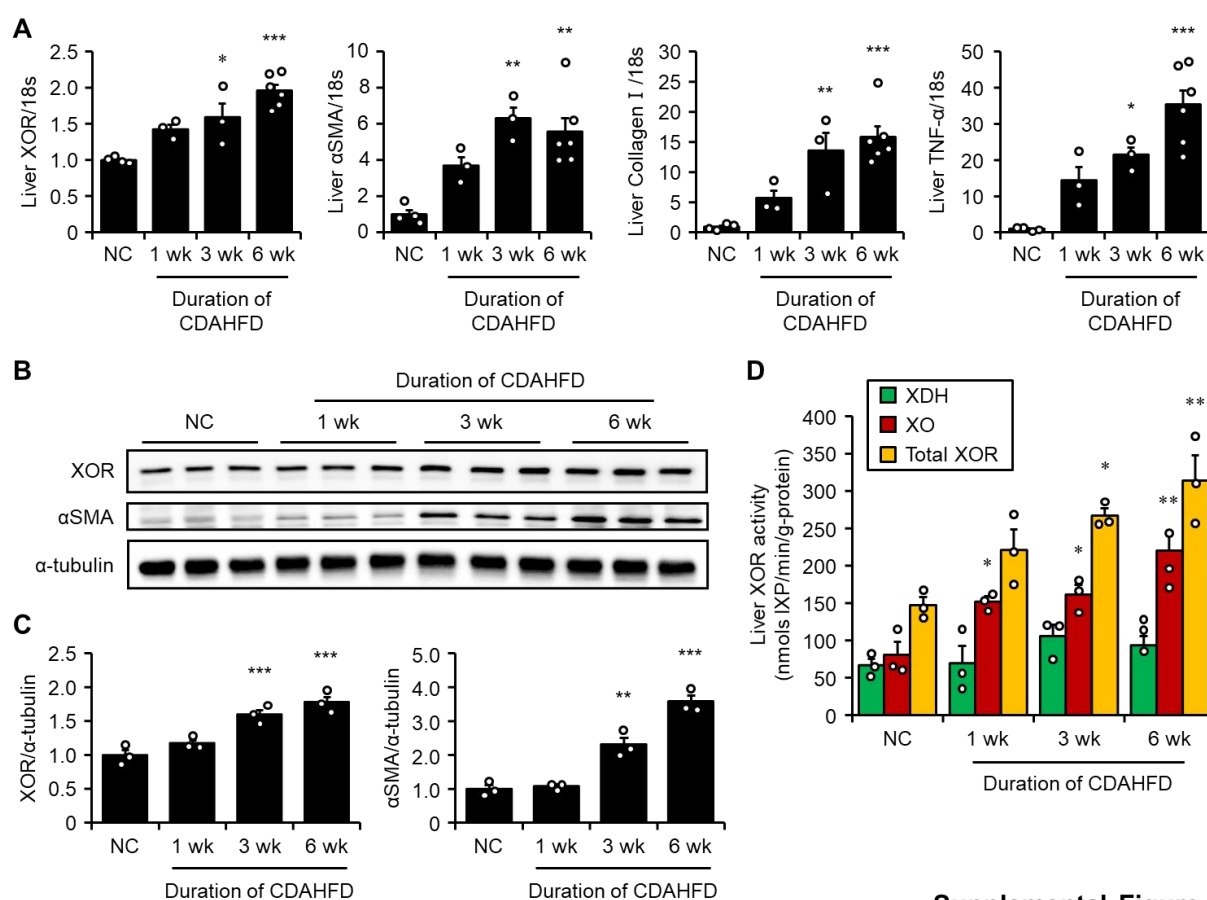

Supplemental Figure 1

Male C57BL/6J mice were fed a choline-deficient, l-amino acid-defined, high-fat diet (CDAHFD) for up to 6 weeks from 8 weeks of age. **(A)** Relative mRNA levels of XOR,  $\alpha$ SMA, collagen type I, and TNF- $\alpha$  in liver. n=4; normal chow (NC) for 6 weeks, n=3; CDAHFD for 1 week and 3 weeks and, n=6; CDAHFD for 6 weeks. **(B)** Immunoblots for XOR,  $\alpha$ SMA, and  $\alpha$ -tubulin in liver. **(C)** Relative protein levels of XOR and  $\alpha$ SMA normalized to  $\alpha$ -tubulin. n=3 for each group. **(D)** Liver XDH, XO, and total XOR activity after feeding with CDAHFD. The HPLC-FLD method was used to distinguish between XO activity and total XOR (XO + XDH) activity. XDH activity was calculated by subtracting XO activity from total XOR activity. n=3 for each group. Data are the mean  $\pm$  SEM. \*P < 0.05, \*\*P < 0.01, and \*\*\*P < 0.001 vs NC (one-way ANOVA with Dunnett's post hoc test).

**Supplemental Figure 2. Body weight, liver weight, and serum lipid profiles in NASH mice treated with topiroxostat.**

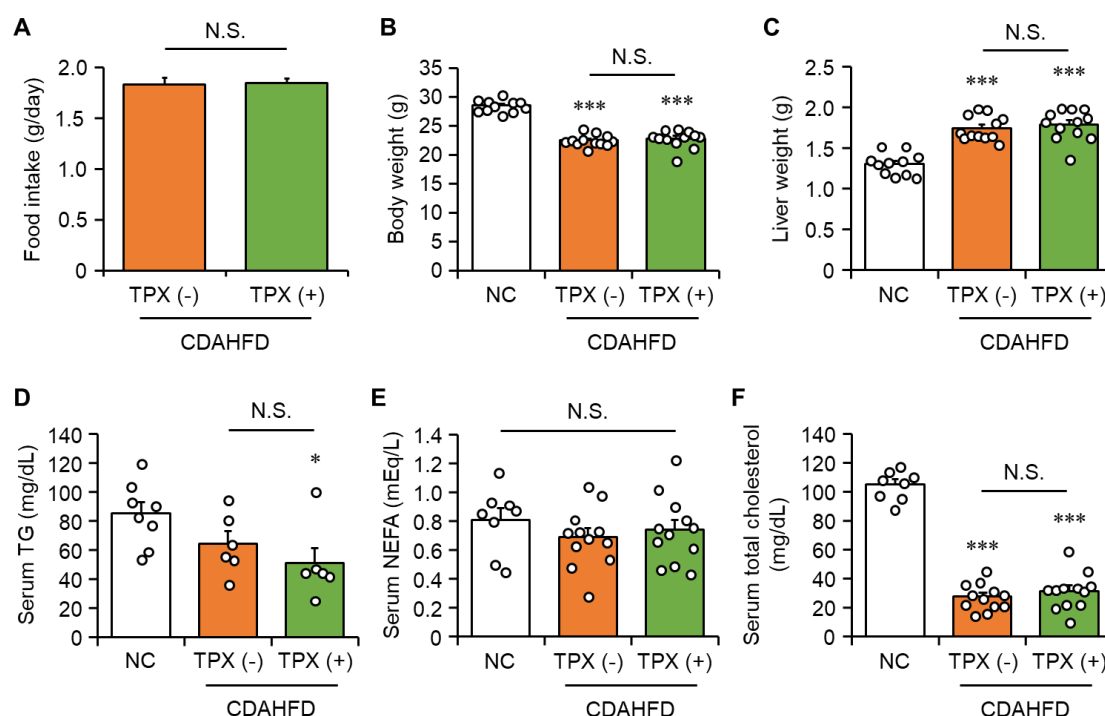

**Supplemental Figure 2**

Male C57BL/6J mice were divided into three groups; fed normal chow (NC) or fed a choline-deficient, l-amino acid-defined, high-fat diet (CDAHFD) treated with or without topiroxostat (TPX) (1 mg/kg/day). Topiroxostat was administered 4 weeks after feeding with CDAHFD, and all mice were examined 8 weeks after feeding with each diet. **(A)** Food intake in mice fed CDAHFD treated with or without topiroxostat.  $n=11$  for NC,  $n=12$  for CDAHFD/TPX (-), and  $n=13$  for CDAHFD/TPX (+). N.S., not significant (unpaired t test). **(B and C)** Body weight **(B)** and liver weight **(C)** in each group.  $n=11$  for NC,  $n=12$  for CDAHFD/TPX (-), and  $n=13$  for CDAHFD/TPX (+). **(D-F)** Serum triglyceride (TG) **(D)**, serum non-esterified fatty acids (NEFA) **(E)**, and serum total cholesterol **(F)** levels in each group.  $n=8$  for NC and  $n=6$  for CDAHFD/TPX (-) and CDAHFD/TPX (+). Data are the mean  $\pm$  SEM; \* $P < 0.05$ , \*\* $P < 0.01$ , and \*\*\* $P < 0.001$  vs NC. N.S., not significant (one-way ANOVA with Tukey's post hoc test).

# Supplemental Figure 3. Effects of topiroxostat on hepatic steatosis, XOR activity, and purine metabolites in livers of NASH mice.

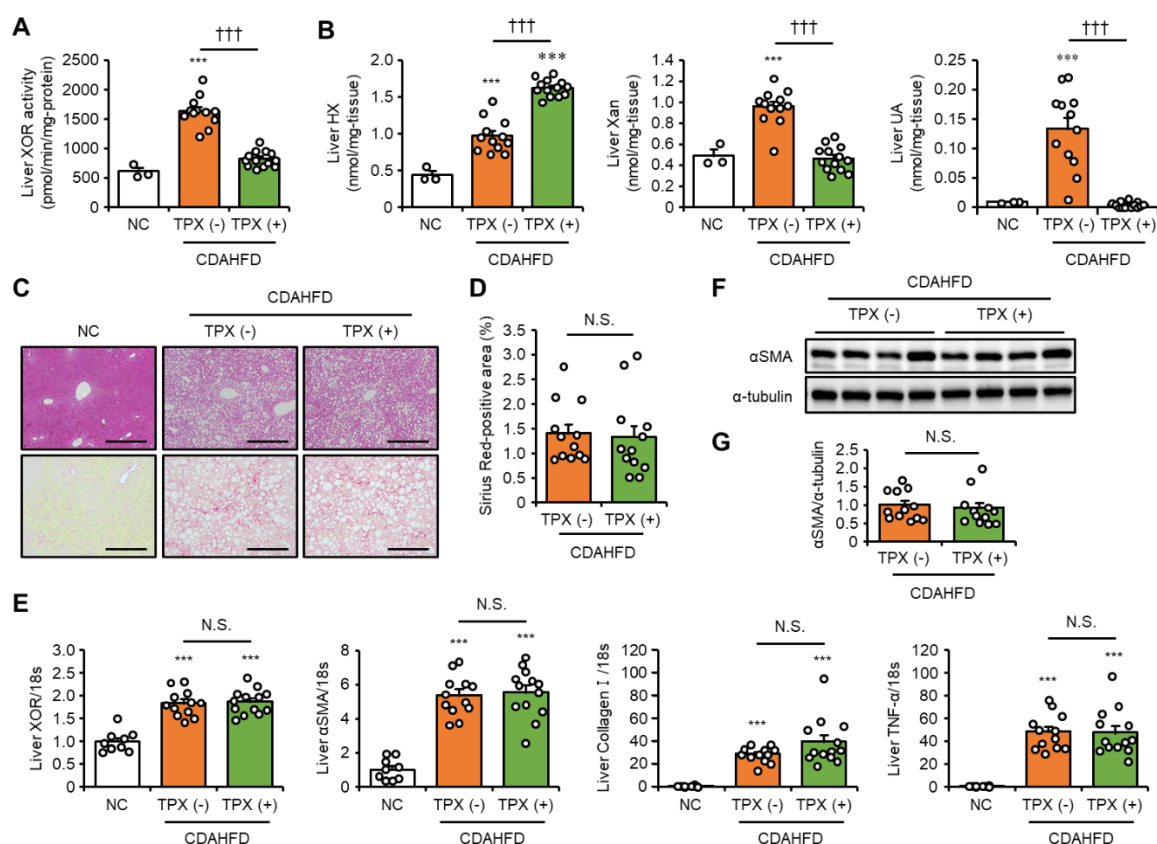

**Supplemental Figure 3**

Male C57BL/6J mice were divided into three groups; fed normal chow (NC) or fed a choline-deficient, l-amino acid-defined, high-fat diet (CDAHFD) treated with or without topiroxostat (TPX) (1 mg/kg/day). Topiroxostat was administered 4 weeks after feeding with CDAHFD, and all mice were examined 8 weeks after feeding with each diet. **(A)** Liver XOR activity measured by the LC/TQMS method in each group.  $n=11$  for NC,  $n=12$  for CDAHFD/TPX (-), and  $n=13$  for CDAHFD/TPX (+). **(B)** Liver concentrations of hypoxanthine (HX), xanthine (Xan), and uric acid (UA) in each group.  $n=3$  for NC,  $n=12$  for CDAHFD/TPX (-), and  $n=13$  for CDAHFD/TPX (+). Data are the mean  $\pm$  SEM; \* $P < 0.05$ , \*\* $P < 0.01$ , and \*\*\* $P < 0.001$  vs NC and † $P < 0.01$ , †† $P < 0.01$ , and ††† $P < 0.001$ . N.S., not significant (one-way ANOVA with Tukey's post hoc test). **(C)** Representative hematoxylin and eosin (H&E) (upper panels) and

Sirius Red (lower panels)-stained sections of livers obtained from each group. Scale bars = 200  $\mu\text{m}$ . **(D)** The percent Sirius Red-positive area was calculated from three randomly selected sections for each mouse.  $n=12$  for each group. N.S., not significant (unpaired t test). **(E)** Relative mRNA levels of XOR,  $\alpha\text{SMA}$ , collagen type I, and  $\text{TNF-}\alpha$  in livers of each group.  $n=10$  for NC,  $n=12$  for CDAHFD/TPX (-), and  $n=13$  for CDAHFD/TPX (+). N.S., not significant (one-way ANOVA with Tukey's post hoc test). **(F)** Immunoblots for  $\alpha\text{SMA}$  and  $\alpha$ -tubulin in liver. **(G)** Relative protein levels of  $\alpha\text{SMA}$  normalized to  $\alpha$ -tubulin.  $n=12$  for each group. N.S., not significant (unpaired t test).



**Supplemental Figure 4. Effects of by-products of XOR, xanthine or uric acid, on proliferation of HASMCs and effects of liver S9-derived XOR on expression of adhesion molecules in HUVECs.**

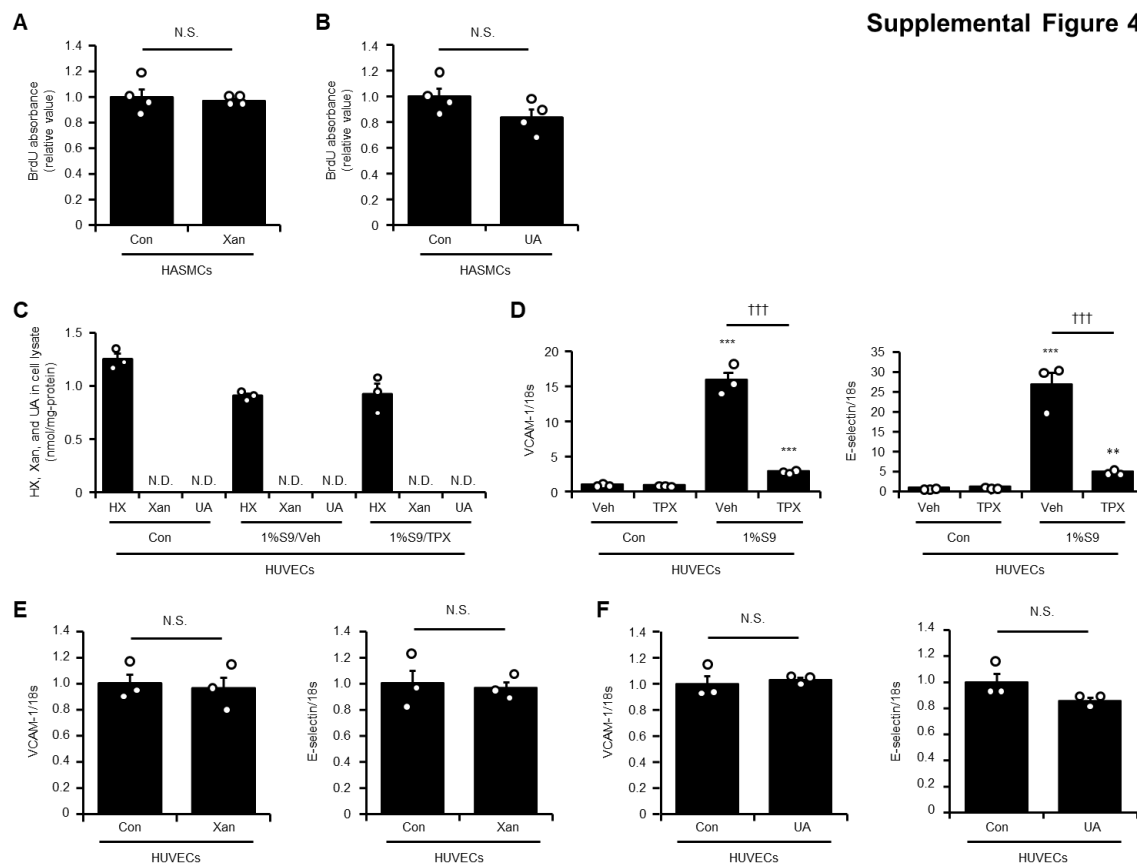

**(A) and (B)** After 24 hrs starvation, human aortic smooth muscle cells (HASMCs) were incubated with or without 20  $\mu$ M of xanthine (Xan) **(A)** or uric acid (UA) **(B)** for 24hrs, and then labeled with BrdU for additional 18 hrs. Shown are relative incorporation of BrdU.  $n=4$  for each group. Data are the mean  $\pm$  SEM. Con, control. N.S., not significant (unpaired  $t$  test).

**(C) and (D)** Human umbilical vein endothelial cells (HUVECs) were incubated with or without 1 % human liver S9 compartment (S9) in the presence or absence of 10  $\mu$ M topiroxostat (TPX) for 4 hrs. **(C)** Concentrations of hypoxanthine (HX), Xan, and UA in cell lysates.  $n=3$  for each group. **(D)** Relative mRNA levels of VCAM-1 and E-selectin.  $n=3$  for each group. Data are the mean  $\pm$  SEM; \* $P < 0.05$ , \*\* $P < 0.01$ , and \*\*\* $P < 0.001$  vs control (Con, without 1% S9) and † $P < 0.01$ , †† $P < 0.01$ , and ††† $P < 0.001$  (one-way ANOVA with Tukey's post hoc test). N.D., not

detected. **(E)** and **(F)** HUVECs were incubated with or without 20  $\mu$ M of Xan **(E)** or UA **(F)** for 4 hrs. Shown are relative mRNA levels of VCAM-1 and E-selectin. n=3 for each group. Data are the mean  $\pm$  SEM. Con, control. N.S., not significant (unpaired t test).

Supplemental Figure 5. The graphical abstract of this article.

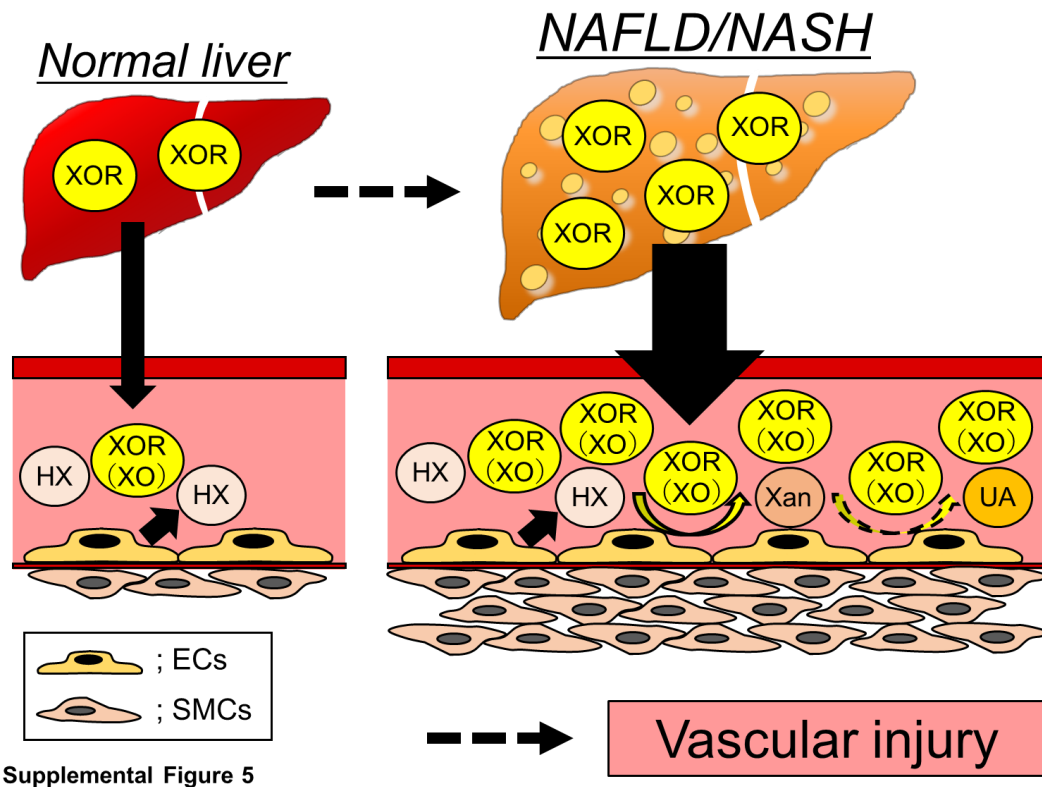

In NAFLD/NASH, plasma XOR (mainly XO) activity is increased due to excess leakage of hepatic XOR from the damaged liver into the circulation, together with its upregulation in liver. Hypoxanthine (HX), a substrate for XOR, is potentially derived from vascular endothelial cells (ECs) and other cells, including adipocytes, and subsequently catabolized to at least xanthine (Xan) by markedly high plasma XOR activity. Such local purine catabolic reactions in the bloodstream may be involved in the initial cascade of vascular injury and subsequent proliferation of vascular smooth muscle cells (SMCs) in NAFLD/NASH conditions.
